# Supplementary material for: TiO2 Nanoribbons/Carbon Nanotubes Composite with Enhanced Photocatalytic Activity; Fabrication, Characterization, and Application
Source: PubMed Central journal article supplement (PMC5768712; doi:10.1038/s41598-018-19172-w), 2018-01-15
Supplement: 41598_2018_19172_MOESM1_ESM.pdf [file 41598_2018_19172_MOESM1_ESM.pdf]

## **Supplementary Data**

# **TiO<sub>2</sub> Nanoribbons/Carbon Nanotubes Composite with Enhanced Photocatalytic Activity; Fabrication, Characterization, and Application**

Mohamed Shaban<sup>1\*</sup>, Abdallah M. Ashraf<sup>1,2</sup>, Mostafa R. Abukhadra<sup>1,3</sup>

<sup>1</sup> Nanophotonics and Applications Lab, Physics Department, Faculty of Science, Beni-Suef University, Beni-Suef 62514, Egypt

<sup>2</sup> Chemistry Department, Faculty of Science, Beni-Suef University, Beni-Suef 62514, Egypt.

<sup>3</sup> Geology Department, Faculty of Science, Beni-Suef University, Beni-Suef 62514, Egypt.

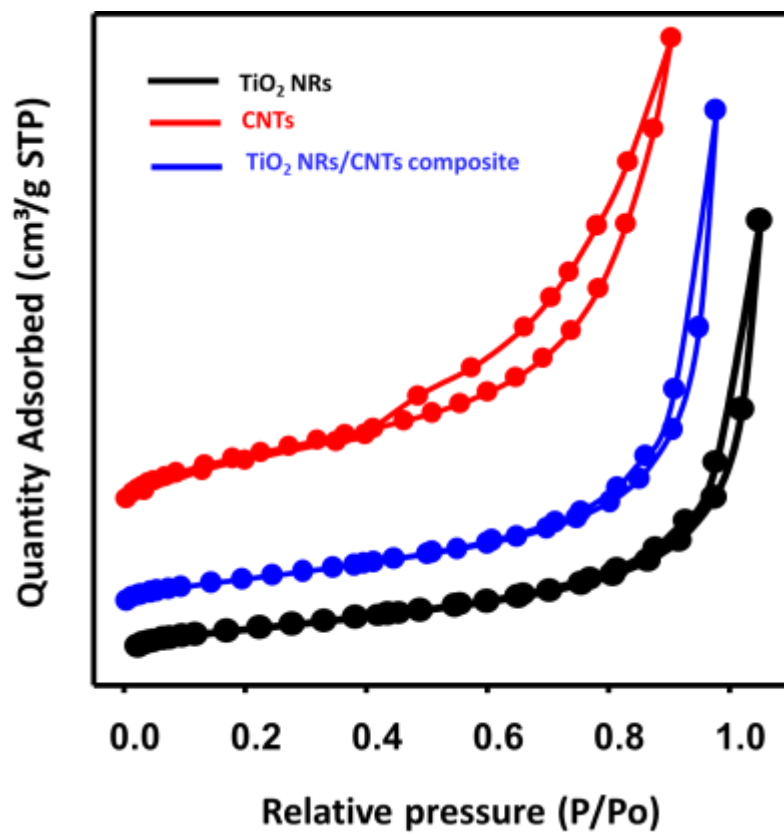

**Fig. S1.** The nitrogen adsorption /desorption isotherm curves of TiO<sub>2</sub> NRs, CNTs, and TiO<sub>2</sub> NRs/CNTs composites.

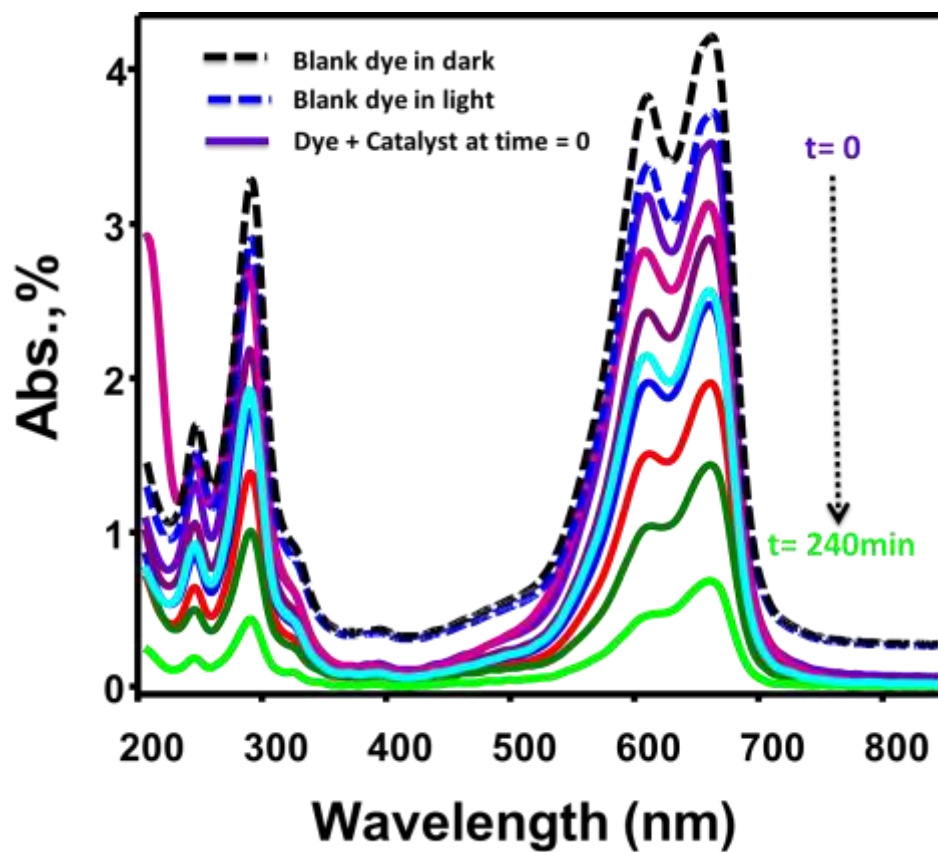

**Fig. S2.** UV-Vis spectra of MB dye solution after sunlight irradiation for different time intervals using a catalyst dose of 0.02g. The dashed lines spectra show UV-Vis absorbance spectra of MB blank sample without any catalyst in dark and light.

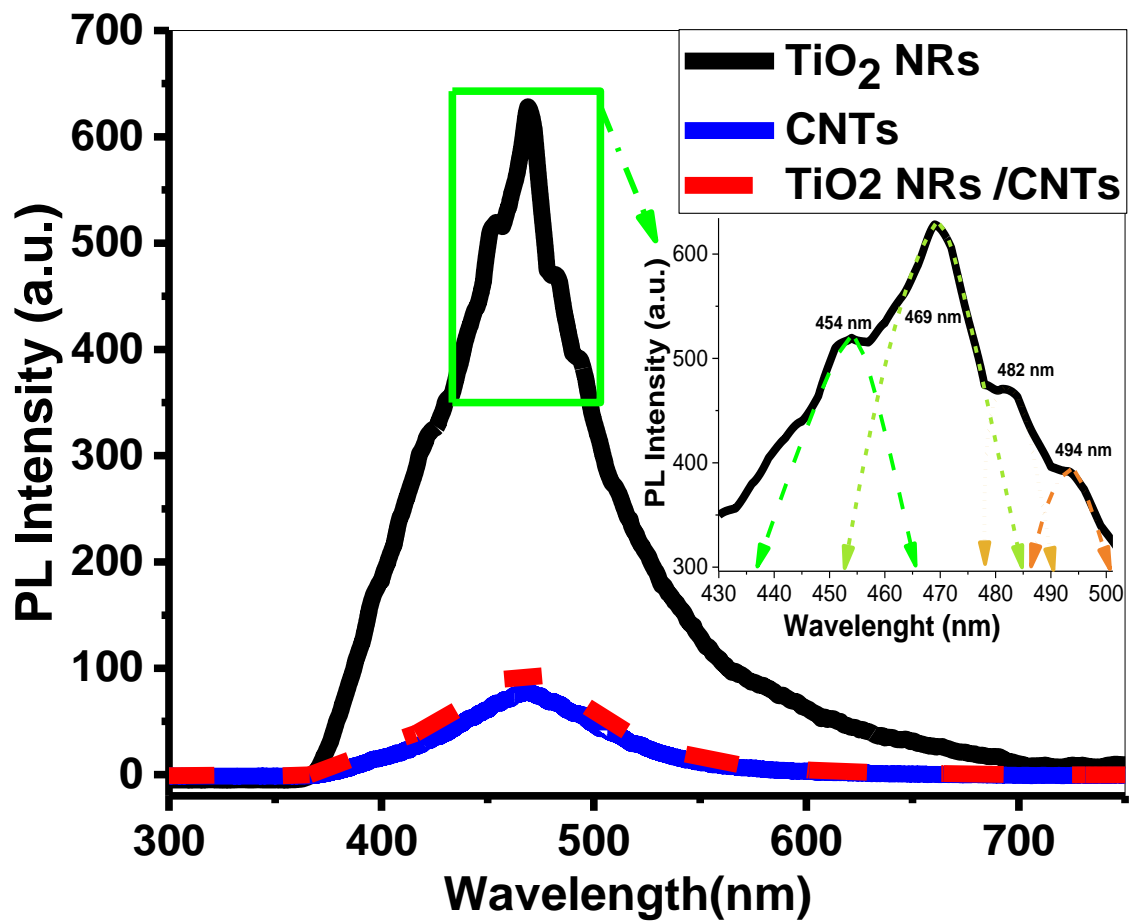

Fig. S3. PL spectra of TiO<sub>2</sub> NRs, CNTs, and TiO<sub>2</sub> NRs/CNTs.
